# Supplementary material for: Association of Vitamin D Intervention and outdoor activity on serum 25-Hydroxyvitamin D among children in North China: an observational study
Source: Research Square preprint supplement (doi:10.21203/rs.3.rs-30985/v3), 2020-10-26
Supplement: Supplementary file 1 [file 5858b9149e832bc777797b6a.pdf]

**Supplement. Table.1 Logistic regression analysis of the association of intervention methods  
with hypovitaminosis D in each age group**

| Intervention methods         | n (%)         | Model 1              | Model 2              | Model 3              |
|------------------------------|---------------|----------------------|----------------------|----------------------|
| <b>0 &lt; age &lt; 3</b>     |               |                      |                      |                      |
| No intervention              | 8891 (33.11)  | 1                    | 1                    | 1                    |
| Supplementation intervention | 13002 (48.42) | 0.359 (0.339, 0.380) | 0.359 (0.340, 0.380) | 0.359 (0.340, 0.380) |
| Therapeutic intervention     | 4961 (18.47)  | 0.188 (0.174, 0.203) | 0.188 (0.174, 0.203) | 0.181 (0.167, 0.196) |
| <b>3 ≤ age &lt; 6</b>        |               |                      |                      |                      |
| No intervention              | 7606 (57.96)  | 1                    | 1                    | 1                    |
| Supplementation intervention | 3237 (24.66)  | 0.561 (0.505, 0.624) | 0.561 (0.505, 0.624) | 0.460 (0.412, 0.514) |
| Therapeutic intervention     | 2281 (17.38)  | 0.244 (0.220, 0.272) | 0.244 (0.220, 0.272) | 0.208 (0.186, 0.232) |
| <b>6 ≤ age &lt; 18</b>       |               |                      |                      |                      |
| No intervention              | 11831 (74.19) | 1                    | 1                    | 1                    |
| Supplementation intervention | 2144 (13.44)  | 0.773 (0.641, 0.932) | 0.775 (0.643, 0.934) | 0.758 (0.629, 0.914) |
| Therapeutic intervention     | 1972 (12.37)  | 0.150 (0.132, 0.170) | 0.149 (0.132, 0.170) | 0.150 (0.132, 0.171) |

Associations were examined using multivariable logistic regression. Model 1: adjusted for sex. Model 2: adjusted for BMI for age on the basis of model 1. Model 3: adjusted for season and outdoor time on the basis of model 2.
